# Supplementary material for: The effect of combined dietary supplementation of herbal additives on carcass traits, meat quality, immunity and cecal microbiota composition in Hungarian white geese
Source: PeerJ. 2023 May 8;11:e15316. doi: 10.7717/peerj.15316 (PMC10174065; doi:10.7717/peerj.15316)
Supplement: Supplemental Information 1 [file peerj-11-15316-s001.xls]

## Sheet: Sheet1
Indicator name	HS group-1	HS group-2	HS group-3	control-1	control-2	control-3
Zn	17	17.3	17.7	19.9	19.5	19.7
P	17.6	16.2	16.6	21	26	23
Fe	21.7	21.5	21.9	41.4	41.4	41.3
Na	62.9	62.3	62.7	72.4	72.5	72.9
Ga	46.3	46.7	46.2	63	61	64
Se	0.0579	0.0584	0.0583	0.17	0.163	0.169
Cholesterol	19.7	19.5	19.2	24.4	24.5	24.9
Energy	533	535	527	495	483	487
Carbohydrates	3.5	3.3	3.2	1.4	1.3	1.2
Aspartic acid	1.81	1.87	1.84	1.63	1.56	1.66
Threonine	0.98	0.91	0.92	0.8	0.84	0.82
Serine	0.8	0.89	0.79	0.5	0.9	0.7
Glutamic acid	3.23	3.25	3.21	2.8	2.75	2.79
Glycine	0.7	0.5	0.9	0.8	0.83	0.88
Alanine	1.2	1.16	1.19	1.16	1.18	1.12
Valine	0.89	0.93	0.99	0.94	0.92	0.91
Methionine	0.55	0.52	0.57	0.4	0.8	0.5
Isoleucine	0.97	0.95	0.92	0.89	0.77	0.81
Leucine	1.3	1.5	1.6	1.47	1.43	1.44
Tyrosine	0.69	0.7	0.73	0.69	0.62	0.66
Phenylalanine	0.5	0.7	0.8	0.71	0.79	0.74
Histidine	0.7	0.72	0.69	0.64	0.69	0.68
Lysine	1.77	1.75	1.73	1.57	1.5	1.55
Arginine	1.25	1.31	1.27	1.16	1.12	1.15
Proline	0.57	0.5	0.54	0.51	0.59	0.52
Total amino acids	18.7	18.5	18.69	16.96	16.86	16.93
Moisture	71.7	71.6	71.1	72.4	72.1	72.8
Protein	19.6	19.3	19.7	19.9	19.2	19.7
Fat	3.68	3.74	3.72	3.54	3.55	3.56
