# Supplementary material for: The effect of combined dietary supplementation of herbal additives on carcass traits, meat quality, immunity and cecal microbiota composition in Hungarian white geese
Source: PeerJ. 2023 May 8;11:e15316. doi: 10.7717/peerj.15316 (PMC10174065; doi:10.7717/peerj.15316)
Supplement: Supplemental Information 2 [file peerj-11-15316-s002.xls]

## Sheet: Sheet1
Slaughter performance
	Group	Pre-slaughter live weight	Slaughter weight	Semi-clean chamber weight	Full net bore weight	Pectoral weight	Leg muscle weight	Slaughter rate	Semi-clear bore rate	Full net bore rate	Pectoral rate	Leg Muscle Rate
1	HS-1	4000	3590	3279	2919	487	399	0.8975	0.81975	0.72975	0.166838	0.136691
2	HS-2	4170	3700	3468	3048	452	378	0.88729	0.831655	0.730935	0.148294	0.124016
3	HS-3	3830	3650	3062	2762	400	332	0.953003	0.799478	0.721149	0.144823	0.120203
4	HS-4	3220	3010	2634	2224	400	304	0.934783	0.818012	0.690683	0.179856	0.136691
5	HS-5	4160	3460	3132	2762	400	332	0.831731	0.752885	0.663942	0.144823	0.120203
6	HS-6	3432	2870	2770	2480	302	350	0.836247	0.80711	0.722611	0.121774	0.141129
7	CON-1	4790	4100	3706	3350	522	476	0.85595	0.773695	0.699374	0.155821	0.14209
8	CON-2	4600	4060	3746	3186	389	406	0.882609	0.814348	0.692609	0.122097	0.127433
9	CON-3	4840	4300	4017	3547	357	507	0.88843	0.829959	0.732851	0.100648	0.142938
10	CON-4	3580	3140	2903	2573	351	403	0.877095	0.810894	0.718715	0.136417	0.156627
11	CON-5	3550	3070	2818	2448	387	308	0.864789	0.793803	0.689577	0.158088	0.125817
12	CON-6	3880	3410	3136	2856	241	466	0.878866	0.808247	0.736082	0.0843838	0.163165
