# Supplementary material for: The effect of combined dietary supplementation of herbal additives on carcass traits, meat quality, immunity and cecal microbiota composition in Hungarian white geese
Source: PeerJ. 2023 May 8;11:e15316. doi: 10.7717/peerj.15316 (PMC10174065; doi:10.7717/peerj.15316)
Supplement: Supplemental Information 3 [file peerj-11-15316-s003.xls]

## Sheet: Sheet1
OD
	IgA	IgM	IgG
CON(43d) 0112	0.3234	0.2842	0.2166
CON(43d) 0122	0.451	0.3845	0.2286
CON(43d) 0087	0.4125	0.4165	0.2595
HS(43d) 0182	0.4388	0.3382	0.3191
HS(43d) 0174	0.3907	0.3215	0.3047
HS(43d) 0130	0.4364	0.2987	0.2739
CON(70d) 0164	0.3196	0.2519	0.1494
CON(70d) 0012	0.3303	0.2913	0.1763
CON(70d) 0044	0.31	0.2487	0.1691
HS(70d) 0086	0.4167	0.3546	0.274
HS(70d) 0094	0.4094	0.3696	0.2162
HS(70d) 0182	0.4118	0.3879	0.2422
group	IgA	IgM	IgG
CON(43d)	295.46	2145.23	1608.38
HS(43d)	320.71	1867.7	2088.21
CON(70d)	222.92	1503.27	1086.54
HS(70d)	311.76	2204.11	1677.25
